# Supplementary material for: Uterine macrophages and NK cells exhibit population and gene-level changes after implantation but maintain pro-invasive properties
Source: PubMed Central journal article supplement (PMC10985329; doi:10.3389/fimmu.2024.1364036), 2024-03-19
Supplement: DataSheet_1.pdf [file DataSheet_1.pdf]

## *Supplementary Material*

### **Uterine macrophages and NK cells exhibit population- and gene-level changes after implantation but maintain pro-invasive properties**

**Sneha Mani,<sup>1</sup> James Garifallou,<sup>2</sup> Se-jeong Kim,<sup>3</sup> Michael K. Simoni,<sup>1</sup> Dan Dongeun Huh,<sup>3,4</sup> Scott M. Gordon,<sup>2,5,\*</sup> Monica Mainigi<sup>1,\*</sup>**

<sup>1</sup>Division of Reproductive Endocrinology and Infertility, University of Pennsylvania, Perelman School of Medicine, Philadelphia, PA, USA

<sup>2</sup>Division of Neonatology, Children's Hospital of Philadelphia, Philadelphia, PA, USA

<sup>3</sup>Department of Bioengineering, School of Engineering and Applied Science, University of Pennsylvania, Philadelphia, PA, USA

<sup>4</sup>Center for Engineering MechanoBiology, School of Engineering and Applied Science, University of Pennsylvania, Philadelphia, PA, USA

<sup>5</sup>Department of Pediatrics, University of Pennsylvania, Perelman School of Medicine, Philadelphia, PA, USA

\* These authors contributed equally to this work and share senior authorship, listed in alphabetical and ascending height order.

**Correspondence:** [gordons1@chop.edu](mailto:gordons1@chop.edu), [monica.mainigi@pennmedicine.upenn.edu](mailto:monica.mainigi@pennmedicine.upenn.edu)

**SUPPLEMENTARY FIGURE 1**

**A**

| Condition | Patient | Ethnicity | Age | BMI  |   | Prior Losses |
|-----------|---------|-----------|-----|------|---|--------------|
| MSE/ENDO  | 1       | Asian     | 23  | 19.8 | - | 0            |
| MSE/ENDO  | 2       | White     | 29  | 20.9 | - | 0            |
| MSE/ENDO  | 3       | White     | 33  | 23.8 | - | 0            |
| MSE/ENDO  | 4       | White     | 23  | 24   | - | 0            |

| Condition | Patient | Ethnicity        | Age | BMI  | EGA   | Prior Losses |
|-----------|---------|------------------|-----|------|-------|--------------|
| FT        | 1       | White            | 32  | 20.3 | 5w6d  | 0            |
| FT        | 2       | African-American | 29  | 23.1 | 6w3d  | 0            |
| FT        | 3       | African-American | 29  | 28.5 | 9w3d  | 0            |
| FT        | 4       | African-American | 24  | 29.1 | 11w4d | 1            |

**B**

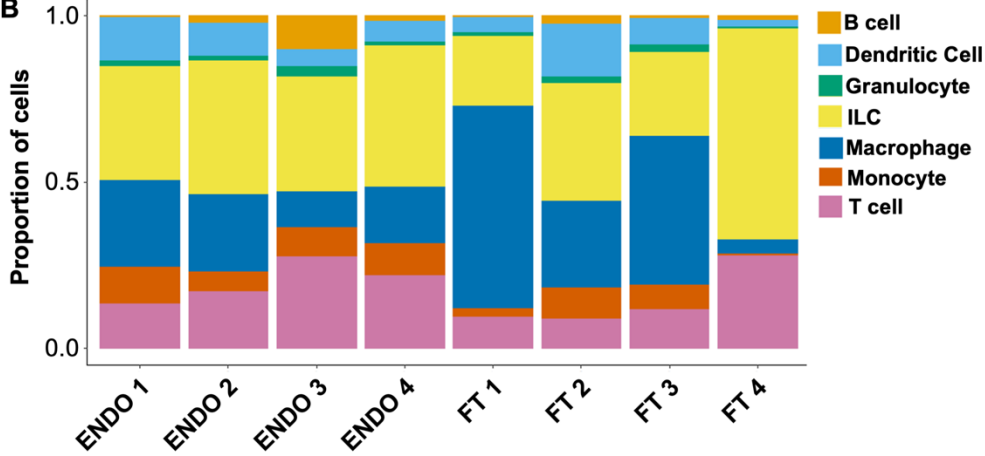

**C**

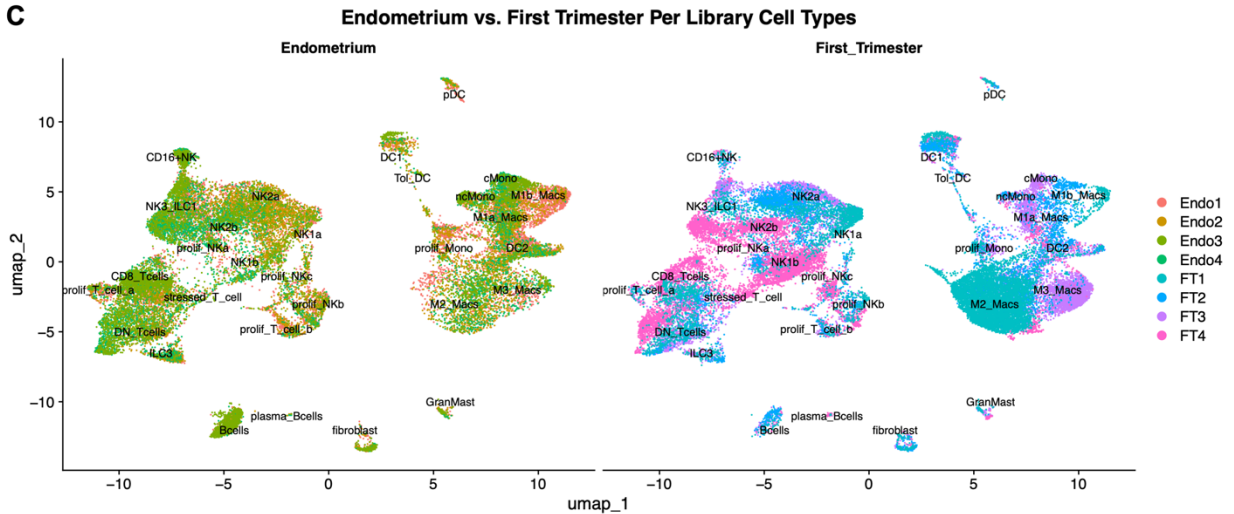

**Supplementary Figure 1. Demographics of patients included in this study and immune composition by supercluster of individual samples.**

(A) Demographics of subjects from whom CD45+ cells were obtained for scRNAseq.

MSE/ENDO, window of implantation (mid-secretory) endometrium. FT, first trimester decidua.

(B) Stacked bar graphs show each supercluster as a percentage of total CD45+ cells in indicated samples of window of implantation (mid-secretory) endometrium (ENDO) and first trimester decidua (FT).

(C) Split UMAPs show the contributions of individual samples to endometrial (Endo) and first trimester (FT) decidual subclusters.

## SUPPLEMENTARY FIGURE 2

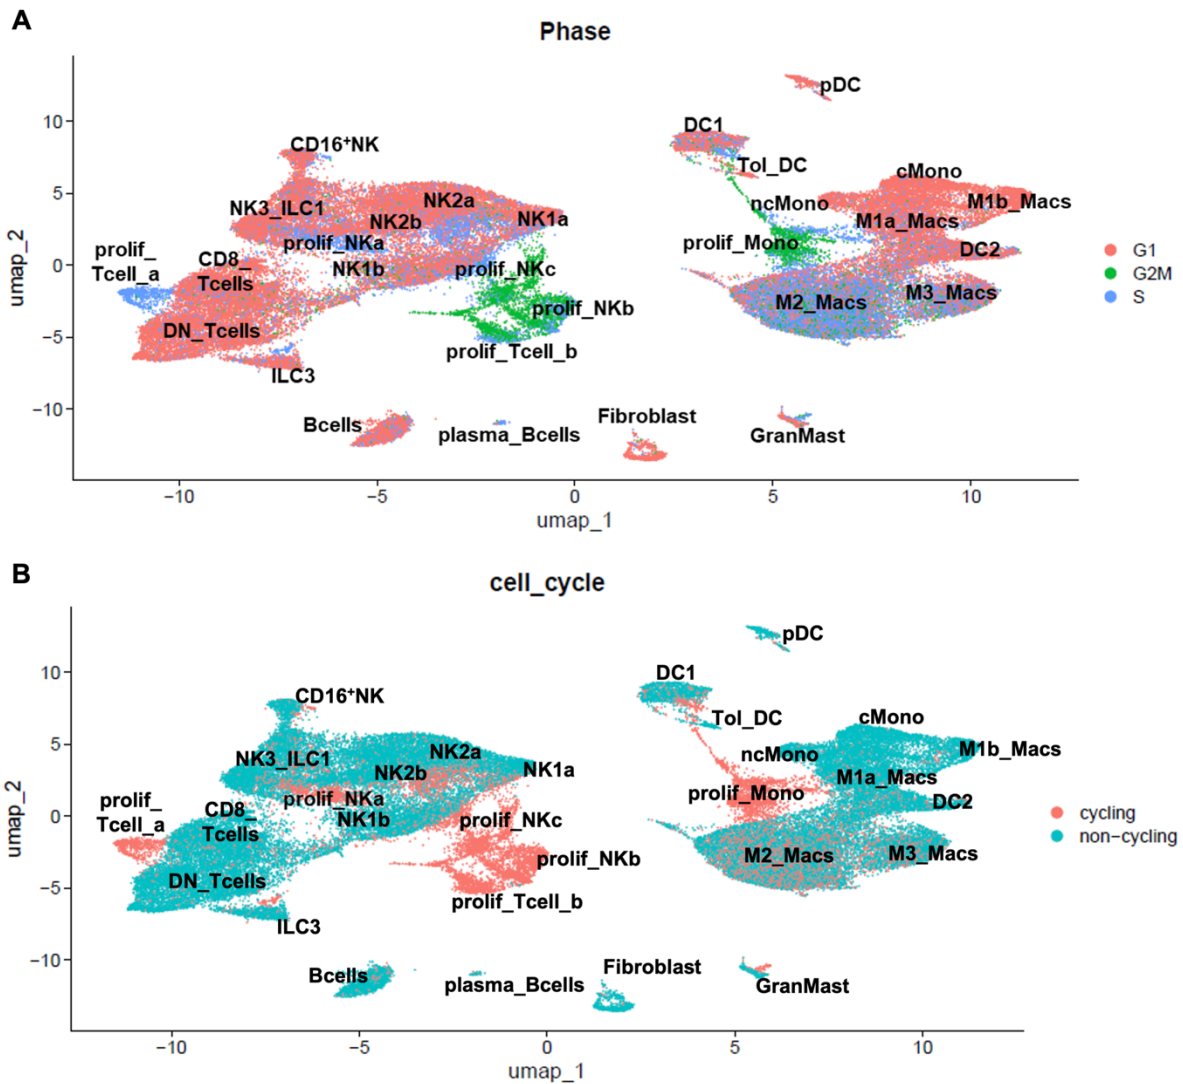

**Supplementary Figure 2. Cell cycle analysis guides identification of proliferative immune subclusters.**

(A) Cells shown in red are predicted to be in the G1 phase of the cell cycle, cells shown in green are predicted to be in G2/M phase, and cells shown in blue are predicted to be in S phase.

(B) Similar to (A), cells shown in red are predicted to have entered the phases of the cell cycle associated with active division, while teal cells are not predicted to be actively dividing.

**SUPPLEMENTARY FIGURE 3**

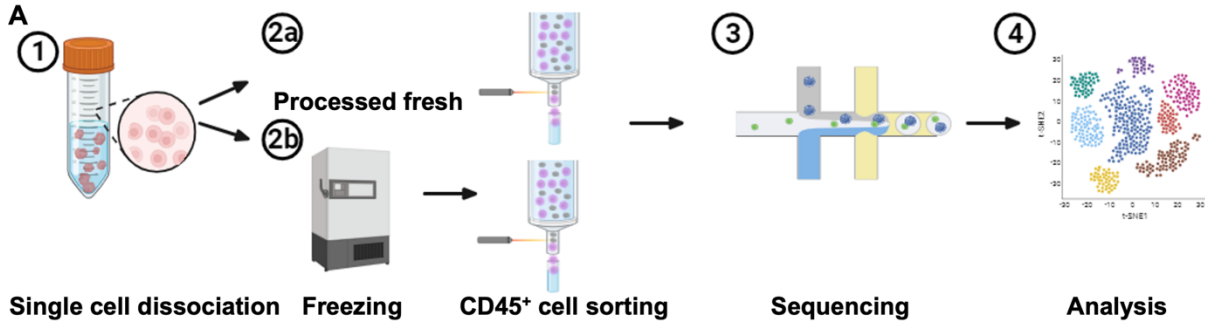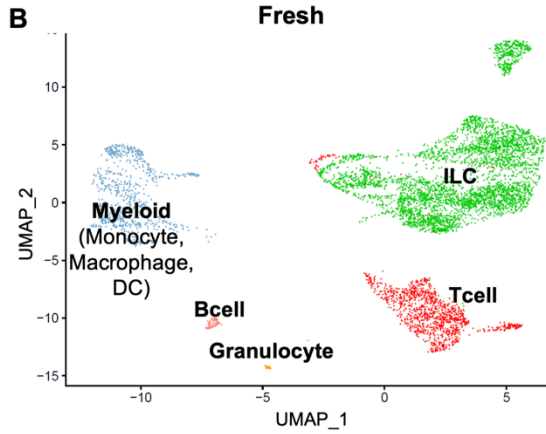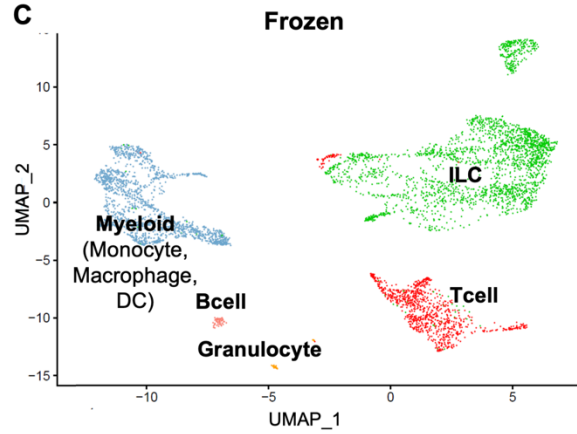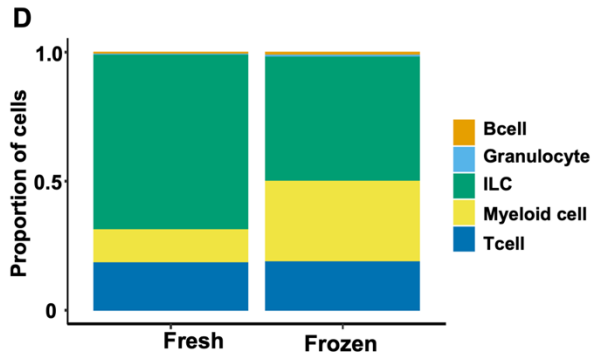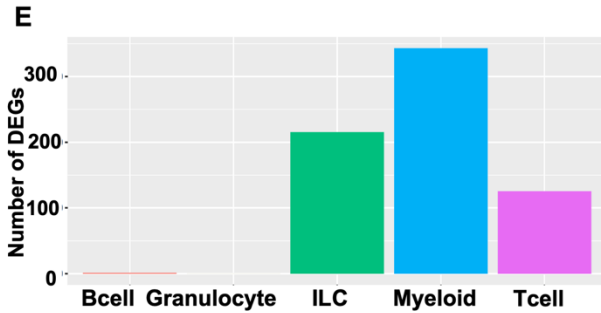

| Myeloid     |             |             | ILCs        |             |             |
|-------------|-------------|-------------|-------------|-------------|-------------|
| GENE SYMBOL | AVG LOG2FC  | ADJ P VALUE | GENE SYMBOL | AVG LOG2FC  | ADJ P VALUE |
| GNLV        | 2.773140706 | 0.000100081 | CYP26A1     | 1.182911436 | 9.08E-41    |
| NKG7        | 1.560181824 | 1.84E-05    | SPINK2      | 1.068238959 | 1.16E-23    |
| GZMA        | 1.439200012 | 3.05E-05    | GNLV        | 1.058311845 | 6.12E-94    |
| IL2RB       | 1.388372409 | 4.41E-10    | IGFBP7      | 1.056597177 | 2.09E-47    |
| TRDC        | 1.077737589 | 8.44E-05    | KIR2DL3     | 0.971549397 | 2.79E-47    |
| KLRB1       | 1.001355502 | 0.0001023   | ADAMTS1     | 0.919063879 | 2.96E-28    |
| IL32        | 0.778293254 | 0.033197277 | AFAP1L2     | 0.882989684 | 1.17E-44    |
| RPS10       | 0.668243728 | 5.65E-77    | ITGAD       | 0.84760035  | 2.98E-45    |
| LGALS2      | 0.582725433 | 2.96E-18    | SLC12A8     | 0.83331168  | 2.42E-31    |
| CXCR4       | 0.565182655 | 0.001314232 | CSF1        | 0.830772466 | 2.72E-25    |
| CD300E      | 0.556975733 | 0.000298315 | KIR2DL1     | 0.801509892 | 7.51E-23    |
| FCER1A      | 0.491461162 | 0.001236627 | EPAS1       | 0.784828344 | 2.65E-29    |
| RPL23       | 0.472650995 | 4.02E-40    | IL2RB       | 0.752076257 | 5.40E-149   |
| AREG        | 0.470100372 | 1.53E-06    | MYO1E       | 0.715569388 | 1.33E-25    |
| RPS11       | 0.45288378  | 7.28E-53    | SLC44A1     | 0.710101712 | 5.49E-27    |
| CD1C        | 0.452081876 | 0.001355567 | ACY3        | 0.702408294 | 7.00E-17    |
| RPS20       | 0.444437081 | 3.08E-20    | GZMB        | 0.699019509 | 1.02E-58    |
| RPL7        | 0.433984623 | 2.30E-43    | KIR3DL1     | 0.697150963 | 6.05E-17    |
| RPL31       | 0.429344851 | 1.15E-27    | ABHD2       | 0.631028183 | 3.51E-28    |
| FOSL2       | 0.423073931 | 3.57E-05    | HIPK2       | 0.613581866 | 1.09E-25    |
| IGF1        | -1.39469571 | 1.88E-15    | AC253572.2  | -0.59914772 | 7.46E-11    |
| MSR1        | -1.42313905 | 3.44E-23    | MTRNR2L8    | -0.6021063  | 5.84E-08    |
| FCGBP       | -1.45020023 | 4.11E-18    | PFN1        | -0.61602268 | 4.52E-161   |
| SLCO2B1     | -1.46293799 | 3.18E-23    | MT-ATP8     | -0.62418172 | 2.11E-44    |
| A2M         | -1.62195104 | 5.05E-21    | TUBA1A      | -0.64166352 | 3.79E-37    |
| STAB1       | -1.6320888  | 3.72E-24    | SEPTIN1     | -0.65149936 | 1.13E-34    |
| GAL3ST4     | -1.67721967 | 6.59E-27    | ITM2C       | -0.65716653 | 1.47E-24    |
| LYVE1       | -1.72912978 | 1.39E-14    | IFITM1      | -0.69523371 | 2.83E-24    |
| APOC1       | -1.76372745 | 8.74E-20    | ALOX5AP     | -0.71741684 | 1.47E-63    |
| MAF         | -1.82712141 | 4.80E-24    | RGS2        | -0.71891451 | 1.02E-27    |
| PLTP        | -1.84705175 | 6.13E-28    | LTB         | -0.73504358 | 4.38E-23    |
| HAMP        | -1.88080831 | 4.38E-19    | LINC01871   | -0.75624479 | 1.40E-25    |
| FOLR2       | -2.12629776 | 9.46E-36    | ARF5        | -0.80881552 | 1.96E-35    |
| DAB2        | -2.17925705 | 3.68E-21    | LYZ         | -1.14345605 | 4.20E-68    |
| CCL2        | -2.22074164 | 9.45E-20    | CST3        | -1.16993438 | 1.64E-85    |
| NRP1        | -2.38230962 | 2.72E-28    | HLA-DPB1    | -1.23909116 | 1.21E-80    |
| APOE        | -2.48653915 | 6.88E-31    | CD74        | -1.28848108 | 2.37E-151   |
| SPP1        | -2.66783398 | 9.56E-06    | HLA-DPA1    | -1.33397876 | 2.59E-107   |
| SELENOP     | -2.83889601 | 2.74E-27    | HLA-DRB1    | -1.76235973 | 1.66E-190   |
| RNA5E1      | -3.7120661  | 7.34E-24    | HLA-DRA     | -1.89840892 | 1.98E-216   |

Increased in Fresh

Increased in Frozen

**Supplementary Figure 3. Similar clustering, similar gene expression profiles, and modest relative decrease in ILC representation when sequencing previously frozen uterine immune cells.**

(A) Graphical representation of workflow to dissociate MSE tissue, process and sort CD45+ cells fresh or frozen/thawed, and perform scRNAseq.

(B, C) UMAP plots showing superclustering of CD45+ cells meeting quality metrics, recovered from fresh (B) and frozen/thawed (C) MSE. ILC, innate lymphoid cells.

(D) Stacked bar charts showing proportion of total CD45+ cells represented by each supercluster in fresh and frozen/thawed MSE.

(E) Bar graph showing absolute number of significant, differentially expressed genes (DEGs) in indicated fresh versus frozen/thawed superclusters. Significant genes are defined as having an adjusted p value of  $<0.05$  and an absolute fold change of 25% or greater (either  $\geq 25\%$  enriched in fresh or  $\geq 25\%$  in frozen).

(F) List of the top 20 DEGs enriched in fresh (highlighted in pale red) or frozen (highlighted in pale yellow) myeloid cells (left) and ILCs (right). Official gene symbol, average log<sub>2</sub> fold change, and adjusted p values are shown.

SUPPLEMENTARY FIGURE 4

Macrophages

| M1a         |              |             | M1b         |              |             | M2          |              |             | M3          |              |             |
|-------------|--------------|-------------|-------------|--------------|-------------|-------------|--------------|-------------|-------------|--------------|-------------|
| GENE SYMBOL | AVG LOG2FC   | ADJ P VALUE | GENE SYMBOL | AVG LOG2FC   | ADJ P VALUE | GENE SYMBOL | AVG LOG2FC   | ADJ P VALUE | GENE SYMBOL | AVG LOG2FC   | ADJ P VALUE |
| SPP1        | -4.638317418 | 2.98E-240   | SELENOP     | -3.4415097   | 2.77E-49    | SELENOP     | -2.439964321 | 0           | SPP1        | -3.09564238  | 7.32E-139   |
| APOE        | -3.422933287 | 3.13E-125   | HLA-DRB5    | -3.243605499 | 5.73E-66    | IFI44L      | -2.183662157 | 3.29E-174   | RNASE1      | -3.0524065   | 4.45E-174   |
| RNASE1      | -2.942427864 | 2.10E-134   | RNASE1      | -3.046674328 | 3.60E-45    | MTSS1       | -2.092628258 | 2.20E-219   | CD28        | -2.342372045 | 6.96E-62    |
| PLIN2       | -2.435063017 | 7.52E-107   | C1QC        | -2.331358802 | 5.53E-39    | JUN         | -2.033339645 | 0           | SELENOP     | -2.220786186 | 8.43E-108   |
| IFIT2       | -2.315354314 | 1.75E-105   | C1QB        | -2.212345034 | 8.04E-33    | CXCL12      | -1.978001633 | 1.37E-113   | IFI44L      | -2.125124548 | 6.47E-60    |
| CTSL        | -2.273440363 | 8.15E-125   | C3          | -2.176899447 | 6.28E-29    | EGR1        | -1.88574926  | 1.00E-206   | AC253572.2  | -2.124581801 | 3.73E-34    |
| MSR1        | -2.266002664 | 1.60E-153   | AC079753.2  | -2.103720904 | 5.92E-49    | PLTP        | -1.677683422 | 5.27E-204   | MSR1        | -2.110509923 | 4.34E-130   |
| IFIT3       | -2.165358975 | 9.49E-109   | C1QA        | -1.94455187  | 1.75E-25    | RNASE1      | -1.648905398 | 2.15E-294   | PLTP        | -2.091330361 | 9.91E-92    |
| ISG15       | -2.144800948 | 1.40E-92    | OTUD1       | -1.517991706 | 2.93E-26    | SERPING1    | -1.62588744  | 2.88E-116   | MX1         | -2.008745289 | 1.25E-70    |
| IFIT1       | -2.070112891 | 1.32E-77    | GBP2        | -1.25724121  | 1.70E-22    | GYP3        | -1.556851464 | 7.72E-194   | IFIT2       | -1.997888471 | 1.95E-27    |
| FABP5       | -2.053047327 | 4.33E-65    | TMEM176B    | -1.251622022 | 3.85E-20    | C3          | -1.453697847 | 5.64E-205   | TMIGD3      | -1.991682969 | 6.79E-29    |
| APOC1       | -2.04401613  | 1.58E-22    | TNFAIP8     | -1.16969046  | 4.94E-13    | F13A1       | -1.450850343 | 2.74E-229   | SDC2        | -1.989267739 | 2.24E-35    |
| FN1         | -1.911606611 | 3.07E-16    | PLCG2       | -1.154105498 | 1.46E-41    | IGF1        | -1.446924203 | 6.08E-164   | FABP5       | -1.84693005  | 1.44E-52    |
| IFITM3      | -1.774934547 | 2.90E-162   | TNF         | -1.151543835 | 1.18E-26    | TNFAIP3     | -1.446276681 | 3.52E-117   | IFIT3       | -1.817953622 | 3.83E-37    |
| C15orf48    | -1.739616828 | 3.29E-118   | KCNJ2       | -1.12453467  | 2.15E-09    | DUSP6       | -1.427105908 | 8.84E-187   | AL021155.5  | -1.813318542 | 1.35E-20    |
| IFB         | -1.721137884 | 3.52E-100   | AC253572.2  | -1.106470433 | 2.95E-11    | SIGLEC1     | -1.402423088 | 2.20E-116   | AC007952.4  | -1.798364341 | 6.22E-42    |
| MX1         | -1.685606731 | 8.60E-90    | AC016831.1  | -1.106252747 | 2.78E-10    | KLFA        | -1.37306504  | 3.78E-148   | C2          | -1.796847478 | 1.23E-65    |
| C1QC        | -1.520482531 | 1.98E-68    | PEL1        | -1.086061856 | 3.83E-09    | AC020916.1  | -1.372529963 | 4.49E-170   | ITSN1       | -1.757379875 | 7.62E-51    |
| GNPMB       | -1.517720264 | 2.45E-34    | CCL4L2      | -1.030213141 | 5.46E-15    | FOSB        | -1.366707814 | 9.40E-260   | IFIT1       | -1.750805244 | 5.89E-30    |
| IFI44L      | -1.507481269 | 1.81E-80    | TMEM176A    | -0.979282339 | 3.16E-10    | AZIN1-AS1   | -1.338123165 | 3.09E-43    | CADM1       | -1.725718181 | 3.99E-33    |
| SELENOK     | 1.115505488  | 1.96E-56    | IFI30       | 1.014130679  | 3.31E-29    | RPS26       | 1.245287923  | 1.40E-231   | ALDH2       | 1.408923465  | 2.68E-50    |
| MEGF9       | 1.122443393  | 3.32E-42    | ARL4A       | 1.072553529  | 7.75E-07    | SH3BGRL3    | 1.255977852  | 4.56E-270   | FGL2        | 1.426427944  | 4.71E-80    |
| CYCS        | 1.13597871   | 1.05E-59    | AL034397.3  | 1.072708793  | 6.89E-06    | LST1        | 1.293226532  | 7.20E-288   | WARS        | 1.429078129  | 5.50E-36    |
| OSM         | 1.220625209  | 1.14E-32    | CAPG        | 1.089375807  | 5.07E-15    | CKLF        | 1.298491742  | 4.89E-130   | RGS2        | 1.493943124  | 2.11E-42    |
| RGS2        | 1.22407144   | 2.18E-118   | ATP1B3      | 1.101648473  | 4.71E-15    | FABP5       | 1.305355244  | 4.42E-127   | JAML        | 1.504359769  | 1.33E-49    |
| LTA4H       | 1.255422013  | 2.00E-90    | RNASE2      | 1.14674881   | 4.77E-05    | CAMK1       | 1.314733217  | 2.17E-159   | AC020656.1  | 1.559001279  | 1.56E-39    |
| HBEGF       | 1.269804034  | 7.06E-92    | LGALS1      | 1.158075546  | 2.45E-41    | OLR1        | 1.321581445  | 5.52E-125   | CD52        | 1.586117229  | 5.08E-43    |
| S100A9      | 1.282570643  | 1.81E-93    | SELENOK     | 1.17034108   | 5.93E-12    | CD48        | 1.332224142  | 5.23E-133   | LST1        | 1.611174948  | 5.19E-106   |
| FCN1        | 1.290366926  | 3.23E-187   | TIMP1       | 1.301102966  | 2.51E-32    | IFI30       | 1.367408348  | 0           | ALOX5AP     | 1.687785984  | 1.48E-68    |
| CD1D        | 1.329404422  | 8.40E-76    | SMIM25      | 1.319207694  | 9.97E-16    | CAPG        | 1.392313109  | 9.39E-251   | IL1B        | 1.701500487  | 1.71E-16    |
| HSPA1B      | 1.340120503  | 1.69E-82    | RPS26       | 1.319979273  | 2.73E-51    | PKIB        | 1.494995422  | 2.49E-160   | HLA-DQB1    | 1.919486116  | 3.43E-162   |
| HLA-DRB5    | 1.346718089  | 8.57E-19    | ALOX5AP     | 1.339827513  | 2.94E-06    | LSP1        | 1.512817154  | 2.63E-180   | LTA4H       | 1.936691276  | 1.04E-62    |
| S100A8      | 1.523703371  | 1.41E-97    | MARCO       | 1.37225202   | 5.63E-08    | S100A6      | 1.583122281  | 9.50E-163   | CYP27A1     | 2.16774256   | 6.45E-79    |
| FBP1        | 1.611252697  | 3.54E-124   | LYZ         | 1.372532812  | 9.79E-88    | TIMP1       | 1.61011874   | 3.61E-187   | GPR183      | 2.217896581  | 1.56E-112   |
| ALOX5AP     | 1.67504248   | 3.89E-131   | TWISTNB     | 1.609231467  | 1.93E-05    | S100A4      | 1.684824959  | 9.15E-264   | OLR1        | 2.248277274  | 4.93E-94    |
| CD52        | 1.768854927  | 6.33E-169   | PLAC8       | 1.690365705  | 2.14E-12    | APOC2       | 1.851674482  | 9.06E-59    | HLA-DQA1    | 2.521097506  | 1.15E-213   |
| MCEMP1      | 1.916024607  | 8.06E-84    | HBEGF       | 2.043722294  | 5.39E-35    | PPA1        | 1.866487525  | 1.74E-283   | CLEC10A     | 2.562361323  | 1.26E-173   |
| LYZ         | 1.976816344  | 0           | MCEMP1      | 2.081796817  | 9.00E-23    | LGALS1      | 2.015593415  | 0           | HLA-DRB5    | 2.675710706  | 2.99E-45    |
| PLAC8       | 2.216325805  | 7.42E-148   | FBP1        | 2.348415738  | 6.54E-19    | CLEC10A     | 2.201682858  | 1.07E-292   | LYZ         | 3.234862239  | 2.61E-161   |
| RETN        | 2.750379612  | 1.08E-112   | RETN        | 2.976923464  | 5.06E-14    | LYZ         | 3.180809276  | 0           | FCN1        | 3.347605228  | 3.60E-144   |

Increased in FT  
Increased in Endo

**Supplementary Figure 4. Top genes differentially expressed between endometrial and first trimester decidual macrophages.**

List of the top 20 DEGs enriched in first trimester decidual (highlighted in pale blue) or pre-implantation endometrial (white cells, unhighlighted) macrophage subclusters. Official gene symbol, average log2 fold change, and adjusted p values are shown.

SUPPLEMENTARY FIGURE 5

ILCs

| NK1a        |              |             | NK1b        |             |             | NK2a        |              |             | NK2b        |             |             | NK3/ILC1    |             |             |
|-------------|--------------|-------------|-------------|-------------|-------------|-------------|--------------|-------------|-------------|-------------|-------------|-------------|-------------|-------------|
| GENE SYMBOL | AVG LOG2FC   | ADJ P VALUE | GENE SYMBOL | AVG LOG2FC  | ADJ P VALUE | GENE SYMBOL | AVG LOG2FC   | ADJ P VALUE | GENE SYMBOL | AVG LOG2FC  | ADJ P VALUE | GENE SYMBOL | AVG LOG2FC  | ADJ P VALUE |
| SELENOP     | -3.286487378 | 5.13E-70    | IGKC        | -3.38274942 | 3.39E-134   | AREG        | -2.27988729  | 6.91E-240   | IGKC        | -2.76513771 | 1.16E-92    | IGKC        | -2.32510205 | 1.36E-171   |
| RNASE1      | -3.082596211 | 4.46E-61    | IFH4L       | -2.74549926 | 3.20E-56    | TSC2D3      | -1.762126651 | 3.20E-211   | IGFBP7      | -2.1002317  | 1.12E-49    | ISG20       | -1.91911875 | 2.65E-145   |
| APOE        | -2.811170483 | 2.85E-47    | ERAP2       | -1.75157023 | 1.84E-52    | APOC2       | -1.521658905 | 7.28E-83    | IFITM1      | -1.86353654 | 2.04E-62    | IFITM1      | -1.63162994 | 7.61E-132   |
| C10B        | -2.483398056 | 6.89E-94    | C10A        | -1.51257766 | 6.33E-41    | FTL         | -1.213380877 | 3.39E-211   | ERAP2       | -1.68379408 | 3.22E-35    | TSC2D3      | -1.41489207 | 2.17E-39    |
| C10A        | -2.465858114 | 1.86E-97    | GOLGA80     | -1.48837148 | 1.47E-29    | SOCS1       | -1.211820709 | 1.20E-121   | SLC44A1     | -1.57200507 | 2.18E-31    | CMC1        | -1.34506182 | 1.71E-125   |
| C10C        | -2.313479019 | 1.37E-72    | MT-ND4L     | -1.48494501 | 6.68E-160   | CDHR1       | -1.180227896 | 3.63E-70    | CMC1        | -1.47057453 | 3.32E-73    | MT2A        | -1.34032774 | 6.15E-70    |
| CD14        | -1.946570705 | 1.04E-52    | MTRNR2L8    | -1.39460687 | 2.39E-50    | DDIT4       | -1.070720681 | 1.79E-108   | CD2         | -1.46758877 | 3.60E-74    | ISG15       | -1.27872845 | 7.17E-68    |
| SPTSSB      | -1.531807209 | 8.40E-29    | SLFN5       | -1.29036196 | 7.39E-83    | JUN         | -1.03059738  | 4.62E-16    | ISG20       | -1.44961106 | 5.14E-33    | STAT1       | -1.19715075 | 1.96E-43    |
| CTSBB       | -1.512068103 | 8.61E-37    | IL32        | -1.284252   | 7.40E-79    | ZFP36L2     | -1.027237395 | 1.69E-192   | ITGAD       | -1.43657197 | 3.53E-31    | XAF1        | -1.14773989 | 1.21E-45    |
| JUN         | -1.47534051  | 6.80E-34    | LINC00426   | -1.28308916 | 4.87E-20    | TXNIP       | -1.021000935 | 5.30E-69    | PLCG2       | -1.40772035 | 3.13E-155   | IFITM3      | -1.10027929 | 7.98E-36    |
| ENTPD1      | -1.465229328 | 5.19E-31    | CD2         | -1.26964224 | 5.39E-40    | DUSP1       | -0.956729478 | 3.00E-58    | MX1         | -1.40759471 | 1.01E-20    | CD2         | -1.08141106 | 1.09E-43    |
| CD74        | -1.386473001 | 6.75E-49    | XAF1        | -1.24371811 | 1.16E-31    | CD74        | -0.920117619 | 8.46E-94    | APOC2       | -1.33097484 | 3.96E-18    | PLCG2       | -1.05224044 | 1.27E-139   |
| CDHR1       | -1.362644826 | 2.80E-13    | MT-ATP8     | -1.23300606 | 1.76E-93    | CEBPD       | -0.85906764  | 2.52E-35    | MT-ATP8     | -1.33955655 | 1.01E-69    | EPST11      | -0.97695656 | 2.88E-33    |
| FTL         | -1.347393971 | 3.60E-89    | SLC44A1     | -1.22749697 | 4.22E-27    | JUNB        | -0.847355756 | 2.75E-50    | GZMB        | -1.29668484 | 4.10E-46    | CEBPD       | -0.95331126 | 1.27E-45    |
| GRN         | -1.297783985 | 9.27E-23    | POLR2J3     | -1.21289231 | 4.04E-35    | ZFP36       | -0.840346831 | 2.50E-76    | IFITM3      | -1.28376097 | 5.02E-27    | GBPS        | -0.94104852 | 1.16E-27    |
| TTN         | -1.26245793  | 0.006650051 | C10B        | -1.16784134 | 3.00E-27    | PNRC1       | -0.81463365  | 5.95E-76    | MT-ND4L     | -1.26651283 | 3.43E-85    | GZMB        | -0.92335229 | 1.05E-32    |
| AC020916.1  | -1.218361039 | 9.09E-07    | BCL2        | -1.1576661  | 5.37E-20    | IFITM1      | -0.79541732  | 1.96E-15    | XAF1        | -1.2592379  | 9.39E-25    | SLFN5       | -0.94104852 | 1.44E-58    |
| ALB27171.2  | -1.216333816 | 8.70E-34    | SNHG14      | -1.14450564 | 1.65E-16    | TTN         | -0.75374794  | 1.04E-17    | GBPS        | -1.12039969 | 2.03E-15    | RPS26       | -0.83310219 | 2.41E-127   |
| SPINK2      | -1.175458988 | 1.67E-06    | ABC2        | -1.09315197 | 4.50E-19    | IGFBP7      | -0.731554468 | 3.10E-32    | AFAP1L2     | -1.11894635 | 1.12E-14    | LYST        | -0.80538633 | 1.10E-21    |
| AREG        | -1.128427028 | 0.768305101 | DTHD1       | -1.08233797 | 1.14E-22    | ID2         | -0.710936116 | 1.33E-78    | ISG15       | -1.08081309 | 1.37E-21    | CD74        | -0.77972827 | 7.33E-48    |
| H2AFZ       | 0.972416938  | 7.95E-35    | ZNF683      | 1.46348116  | 5.54E-41    | CD247       | 0.703307808  | 2.97E-52    | BTG2        | 1.421672573 | 1.32E-31    | MAP3K8      | 0.860412769 | 4.02E-29    |
| MCM7        | 0.999571253  | 2.54E-24    | CRIP1       | 1.46352185  | 1.77E-102   | DUT         | 0.707683957  | 2.43E-16    | LTB         | 1.446373815 | 6.84E-20    | SDFL2.1     | 0.862016341 | 1.44E-23    |
| PCNA        | 1.063885837  | 5.13E-25    | FOSB        | 1.496860774 | 3.34E-62    | TUBB        | 0.720117146  | 2.24E-29    | ALOX5AP     | 1.496245685 | 3.21E-35    | ITGA1       | 0.866028079 | 3.71E-31    |
| RGCC        | 1.068351157  | 6.11E-27    | VPS37B      | 1.497263836 | 7.00E-53    | NME1        | 0.725185111  | 1.05E-29    | RGCC        | 1.55652971  | 7.85E-32    | MANF        | 0.90615418  | 8.66E-26    |
| HSP61       | 1.086633619  | 8.01E-53    | REL         | 1.551583527 | 9.21E-65    | RGCC        | 0.729395112  | 1.24E-43    | FOSB        | 1.68133614  | 2.27E-35    | ZNF331      | 0.909762846 | 6.26E-40    |
| TUBB        | 1.088009826  | 1.72E-28    | CD52        | 1.554015097 | 5.49E-109   | KRT81       | 0.733557734  | 2.83E-75    | DUSP1       | 1.743210527 | 4.62E-29    | CAPG        | 0.923168201 | 2.17E-48    |
| CRIP1       | 1.094339367  | 7.31E-71    | FOSL2       | 1.619735028 | 1.22E-67    | STMN1       | 0.740151364  | 2.86E-20    | CCL3        | 1.837317794 | 1.35E-26    | CCL4        | 0.979494737 | 4.30E-161   |
| LGALS1      | 1.103660131  | 5.19E-59    | DNAJB1      | 1.651133531 | 9.87E-55    | SRM         | 0.747474873  | 2.49E-31    | TNFAIP3     | 1.871572495 | 7.55E-48    | JUND        | 1.03444784  | 3.33E-186   |
| CCL4        | 1.134483705  | 4.00E-58    | LDLRAD4     | 1.737624112 | 8.68E-54    | DCTP1       | 0.75578065   | 1.81E-34    | ZNF331      | 1.891877686 | 2.59E-37    | FASLG       | 1.050403673 | 9.39E-39    |
| MCM6        | 1.141489496  | 1.47E-31    | RAGEFB1B    | 1.752732865 | 9.83E-63    | CXCC5       | 0.761034302  | 4.71E-30    | JUN         | 1.961590153 | 6.11E-41    | EZR         | 1.055925139 | 3.33E-61    |
| MCM3        | 1.156073113  | 8.26E-29    | AC020916.1  | 1.758993431 | 1.89E-72    | IFI27L2     | 0.764337886  | 1.39E-43    | CD160       | 2.030034669 | 1.11E-30    | ITM2C       | 1.057255532 | 4.31E-68    |
| HELLS       | 1.169755773  | 7.42E-31    | CD69        | 1.882197153 | 4.51E-87    | CRIP1       | 0.796084557  | 1.85E-117   | RGS1        | 2.052482398 | 1.2E-55     | LDLRAD4     | 1.14215048  | 1.03E-38    |
| STMN1       | 1.20292107   | 1.67E-32    | TNFAIP3     | 2.07018311  | 4.96E-82    | RGS16       | 0.825089379  | 4.06E-22    | FOS         | 2.074518818 | 8.73E-70    | IGFBP2      | 1.156271131 | 2.23E-74    |
| KRT81       | 1.217706336  | 6.89E-40    | RGS1        | 2.105997426 | 3.38E-111   | TNFRSF18    | 0.837062373  | 1.46E-101   | JUNB        | 2.148435508 | 2.32E-55    | NR4A2       | 1.175737921 | 9.53E-62    |
| MT2A        | 1.329581252  | 1.48E-34    | CCL4        | 2.112263296 | 3.92E-176   | KRT86       | 0.814678537  | 1.01E-86    | CCL4L2      | 2.175643493 | 3.07E-24    | TNFRSF18    | 1.183732138 | 4.72E-68    |
| KRT86       | 1.332648024  | 1.55E-42    | NR4A1       | 2.167304966 | 1.39E-95    | FASLG       | 1.019460434  | 5.37E-68    | CD69        | 2.257855946 | 2.78E-91    | CD52        | 1.442583377 | 3.35E-96    |
| XCL2        | 1.378559642  | 1.55E-72    | ZNF331      | 2.335125829 | 3.82E-92    | CYBA        | 1.050259811  | 2.20E-85    | CCL4        | 2.271248312 | 3.70E-108   | KRT86       | 1.519965014 | 7.37E-130   |
| XCL1        | 1.878432772  | 5.49E-99    | LYZ         | 2.444041285 | 1.74E-198   | CDS2        | 1.170277439  | 3.35E-193   | CXCR4       | 2.423474534 | 1.05E-54    | KRT81       | 1.628185489 | 1.26E-141   |
| CD9         | 1.893770747  | 3.67E-88    | DUSP2       | 2.492049672 | 2.74E-139   | CD9         | 1.248095843  | 5.88E-112   | CD9         | 2.661673804 | 1.07E-76    | LYZ         | 1.766641967 | 1.11E-75    |
| LYZ         | 1.897424676  | 2.34E-39    | NR4A2       | 3.4433553   | 1.57E-298   | LTB         | 1.435621191  | 5.99E-68    | DUSP2       | 2.686693559 | 6.03E-100   | CD9         | 2.09086451  | 3.08E-135   |

Increased in FT  
Increased in Endo

Supplementary Figure 5. Top genes differentially expressed between endometrial and first trimester decidual ILCs.

List of the top 20 DEGs enriched in first trimester decidual (highlighted in pale blue) or pre-implantation endometrial (white cells, unhighlighted) ILC subclusters. Official gene symbol, average log2 fold change, and adjusted p values are shown.



**SUPPLEMENTARY FIGURE 6**

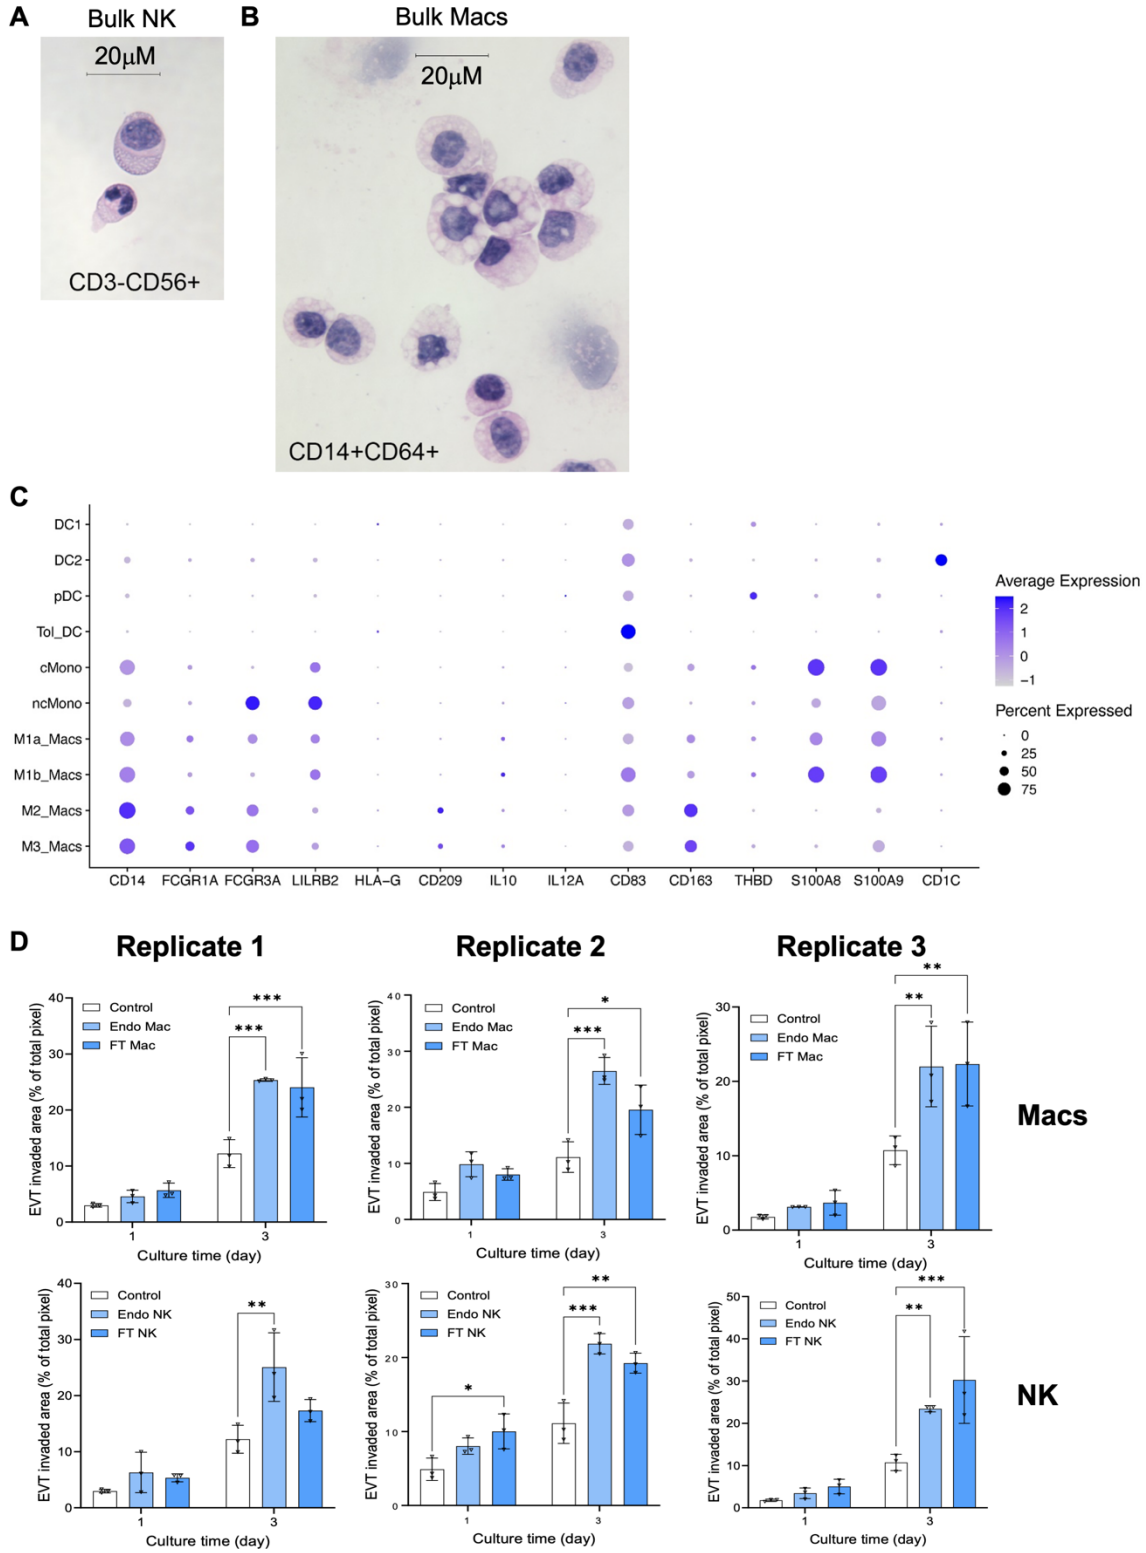

**Supplementary Figure 6. Pre- and post-implantation bulk CD14+CD64+ macrophages promote invasion of primary EVT<sub>s</sub> as strongly as pre- and post-implantation bulk NK cells *ex vivo* on an implantation-on-a-chip device.**

(A,B) H&E-stained cytopins were prepared from cryopreserved first-trimester decidual flow-sorted cells and imaged with a Leica brightfield microscope at 63x. The scale bar shown is 20 microns. Shown are (A) CD3-CD56+ “Bulk NK cells” that appear lymphocytic with abundant fine cytotoxic granules. In (B), CD14+CD64+ “Bulk Macrophages” are predominantly large, heavily vacuolated cells that resemble tissue macrophages.

(C) Dot plot representation of DC10-associated genes expressed among indicated myeloid subclusters.

(D) Quantification of individual biological replicates on the implantation-on-a-chip (IOC). Three technical replicates per biological replicate are shown. Invasion area of EVT<sub>s</sub> beyond the fetal channel at days 1 and 3 of culture are shown. One-way ANOVA with Tukey’s multiple comparison test was performed. Data are presented as mean ± SD. \*, p<0.05; \*\*, p<0.01; \*\*\*, p<0.001.
